# Supplementary material for: Ontogeny of a sexually selected structure in an extant archosaur Gavialis gangeticus (Pseudosuchia: Crocodylia) with implications for sexual dimorphism in dinosaurs
Source: PeerJ. 2020 May 12;8:e9134. doi: 10.7717/peerj.9134 (PMC7227661; doi:10.7717/peerj.9134)
Supplement: Supplemental Information 1 — Each raw measurement is included. [file peerj-08-9134-s001.xlsx]

## Sheet: Institutions
Institutional abbreviations
Abbreviation	Institution
AD	Bristol Museum and Art Gallery, Bristol, UK
AMNH	American Museum of Natural History, New York, USA
BMNH	Natural History Museum, London, UK
CMNH	Cleveland Museum of Natural History, Cleveland, USA
FMNH	Field Museum, Chicago, USA
NH	HC and NH Horniman Museum, London, UK
ISI	Indian Statistical Institute, Kolkata, India
LDUCZ	Grant Museum, London, UK
ZMB	Humboldt Museum for Nature, Berlin, Germany
MCBT	Madras Crocodile Bank Trust, Madras, India
MCZ	Museum of Comparative Zoology, Harvard, Cambridge, Massachusetts
MNHN	National Museum of Natural History, Paris, France
NEWHM	Great North Museum, Newcastle-upon-Tyne, UK
NMINH	National Museum of Ireland, Natural History, Dublin, Ireland
NMW	National Museum of Wales, Cardiff, Wales
No Code	Oklahoma Museum of Osteology, Oklahoma City, USA
OUM	Oxford University Museum, Oxford, UK
QMBC	Queen Mary University of London, London, UK
R	Cambridge Museum of Zoology, Cambridge, UK
REDCZ	Cole Museum, University of Reading, Reading, UK
ROM	Royal Ontario Museum, Toronto, Canada
RSM	Royal Scottish Museum, Edinburgh, Scotland
SM	Senckenberg Museum, Frankfurt, Germany
TMM	Texas Memorial Museum, Austin, USA
UAMZ	University of Alberta, Edmonton, Canada
UCRC	University of Chicago, Chicago, USA
UF	University of Florida, Gainesville
UMMZ	University of Michigan, Ann Arbor, USA
USNM	Smithsonian Museum of Natural History, Washington DC, USA
VIS	Nottingham Natural History Museum, Nottingham, UK
ZSM	Bavarian State Collection for Zoology, Munich, Germany
ZUF	St Augustine Alligator Farm Zoological Park, Jacksonville, USA

## Sheet: Raw data
Specimen_number	Source	Narial fossa present?	Bullae present?	Est. total length	BSL	MW	OCW	SL_RTO	SMW	PEMW	NMW	NML	NFMW	NFML	MWAO	IW	PBL
ZUF049	photo	0	?	0.1665	33.3	13	?	15.3	3.1	3	1.8	2.4	?	?	7.6	1.8	?
Morris et al., 2019_Unnumbered_specimen_	photo	0	?	0.274	54.8	24.5	5.5	25.4	6.5	5.7	3.4	3.1	?	?	17	2	?
ROM R-19	photo	0	0	0.4805	96.1	23	?	61.3	6.1	6.8	?	?	?	?	20.7	4.8	?
LDUCZ-X127	pers. obs.	0	0	0.503	100.6	19.8	6.7	66.5	6	7.3	3	4.4	?	?	?	3	?
Morris et al., 2019_Unnumbered_specimen_	photo	0	?	0.557	111.4	28.7	5.6	76.2	6.9	9.4	3.6	5.7	?	?	24.7	3.9	?	Key
Madras 20181021	photo	0	0	0.903	150.5	32.4	?	107.6	8.2	12.5	4	6.3	?	?	29.2	5.7	?	BSL	Basal skull length (occ cond - pmx tip)
LDUCZ-X134	pers. obs.	0	0	1.0314	171.9	35.4	8.9	126.5	9.71	13.3	4.9	6.9	?	?	35.5	6.7	?	MW	Max width (across quadratojugals)
QMBC 1266	pers. obs.	0	0	1.053	175.5	45.6	6.8	125	9.7	12.9	5.2	8.6	?	?	36.8	7.8	?	OCW	Occipital condyle width
Morphobase_Unnumbered_specimen	photo	0	0	1.1088	184.8	42.3	11.9	127.7	10.5	12.6	?	?	?	?	37.5	8.4	?	SMW	Snout min width (mid snout)
Digimorph_Unnumbered_specimen	photo	0	0	1.1208	186.8	44.4	13.4	128.6	10.2	13.2	5.3	9	?	?	37.6	8.1	?	PEMW	Premaxillary expansion max width
R.5793	photo	0	0	1.1994	199.9	47.2	8	146.5	10.1	14.9	6.1	8.4	?	?	39.8	8.5	?	NMW	Naris max width
TMM-M-5490	photo	0	?	1.2126	202.1	52.3	10.9	145	10.8	15.6	5.6	9.2	?	?	43.8	10.2	?	NML	Naris max length
SM_78886	photo	?	0	1.2954	215.9	57.2	11.5	150	14	20.8	?	?	?	?	50.1	14.2	?	NFMW	Narial fossa max width
SM_40144	photo	0	0	1.329	221.5	62.6	11.6	159.3	12.4	17.9	6.4	9.3	?	?	48.5	11.8	?	NFML	Narial fossa max length (rostr to naris)
OUM5410	pers. obs.	0	0	1.3686	228.1	65.2	12.4	185.4	13.5	19	?	?	?	?	53.8	13.2	?	MWAO	Max width across orbits
FMNH-12459	photo	0	0	1.4778	246.3	70	13.4	177.6	13.2	19.4	7.3	10.7	?	?	57	16.9	?	IW	Interorbital width
FMNH 98864	pers. obs.	0	0	1.4892	248.2	66.5	10.1	181.3	13	20.2	7.8	11.1	?	?	55.6	16.8	?	NFD	Narial fossa depth
UF_70592	photo	0	0	1.5204	253.4	66.7	?	184.3	13.3	22.3	7.1	10.9	?	?	56.3	14.5	?	SL_RTO	Snout length rostral to orbits
BMNH_Unnumbered_specimen	pers. obs.	0	0	1.5327	255.45	70.4	14.1	182.1	14.3	20.9	7.65	10.2	?	?	60.2	17.1	?	PBL	Average pterygoid bulla length
BMNH_96.7.7.4	photo	0	0	1.5348	255.8	72.1	14.6	185.8	13.9	20.8	7.5	9.9	?	?	62.3	18	?
TMM-M-5486	photo	0	?	1.5936	265.6	69	12.7	193.4	14.8	20.5	7.7	12	?	?	57	16.4	?
FMNH-82681	photo	0	0	1.5966	266.1	77.3	12.8	185.1	12.2	18.9	7.1	10.9	?	?	62.5	19.3	?
R.5788	pers. obs.	0	0	1.6266	271.1	71.2	12.7	193.7	14.8	20.6	8.6	11.2	?	?	55.8	16.8	?
TMM-M-5487	photo	0	?	1.6842	280.7	74.7	14.8	205	15.3	22.6	8.6	11.5	?	?	62.4	18	?
BMNH 46-1-7-3	pers. obs.	0	0	1.6866	281.1	69.9	11.9	204.7	14	21.4	7.4	11.3	?	?	57.9	17.4	?
NMW_Unnumbered_Specimen	photo	0	?	1.8522	308.7	82.4	20.9	223.4	14.8	21.9	9.4	11.4	?	?	67.9	19.8	?
SM_28132	photo	0	0	1.8828	313.8	86.4	15.8	230.7	16.4	25.4	9.4	12.9	?	?	67	21.3	?
LDUCZ-X127a	pers. obs.	0	0	1.9074	317.9	90.2	16.4	230.5	16.9	26.1	10.6	12.1	?	?	74.4	23.1	?
OUM21546	pers. obs.	0	0	2.32596	369.2	104.1	18.3	269.5	19.9	15.3	5.67	15.5	?	?	81.5	28.2	?
USNM_72562	photo	0	0	2.39967	380.9	113.3	?	282.6	21.1	30.4	11.2	14.5	?	?	89.4	32.2	?
AD.5647	photo	0	0	2.55528	405.6	127.4	20.3	293	21.9	33.7	12.3	15.5	?	?	100.7	34.8	?
Oaklahoma_7313	photo	0	0	2.583	410	123.7	21.8	298.5	20.9	31.4	11.4	15.4	?	?	93.8	35	?
Madras Crocodile Bank Trust female	pers. obs.	0	0	2.6145	415	187	22	356	36	46	19	21	27	5	140	54	?
REDCZ_ 2352	photo	0	0	2.75814	437.8	134.5	22.4	324.9	26	38.5	?	?	?	?	101.2	34.8	?
BMNH _Unnumbered_specimen	pers. obs.	0	0	2.79783	444.1	140.3	23.7	321.4	25.8	38.9	14.3	21	?	?	105	35.3	?
AMNH_110145	photo	0	1	2.88855	458.5	179.2	25.3	294.2	34.2	47.4	23	22.8	?	?	146.7	61	?
BMHN Specimen 5 of Gray 1873	pers. obs.	0	0	2.89485	459.5	133.6	22.4	332.4	22.8	35.8	14.2	19	?	?	103.4	38.8	?
Alberta__145335	photo	0	0	3.17724	481.4	153	33.9	359.8	31.7	47.9	16.7	21.7	?	?	118.6	44.1	?
AMNH-131377	photo	0	0	3.201	485	186.9	23.2	324.4	29.1	48.1	17.1	22.1	?	?	136.6	49.2	?
BMHN Specimen of Gray 1873	pers. obs.	0	0	3.24918	492.3	157.7	?	359.8	29	44	15.5	22.3	?	?	121.5	39.8	?
TMM-M-5485	photo	0	?	3.2967	499.5	151.5	25.5	373.7	26.1	41.7	16.7	19.7	?	?	123.7	48.7	?
MNHN_SaisieDuanes2012	photo	0	?	3.36996	510.6	178	18.7	367.4	29.4	43.4	16.5	17.5	?	?	143.4	53.9	?							Key
MCZ 33950	photo	0	0	3.37128	510.8	158.3	25.8	382.2	29.8	44.8	16	20.6	?	?	122.1	48.1	?							BSL	Basal skull length (occ cond - pmx tip)
HC.2008.60	pers. obs.	0	?	3.40428	515.8	190.1	36.6	375.3	35	51.7	17.2	22.5	?	?	137.7	53.3	?							MW	Max width (across quadratojugals)
ZSM29_1938_DS	photo	0	?	3.48018	527.3	178.1	28.9	380.8	36	54	18.8	23.3	?	?	132.9	51.9	?							OCW	Occipital condyle width
R.5787	pers. obs.	0	0	3.49404	529.4	175.8	28.5	382.3	30.9	41.9	15.9	20.1	?	?	124.1	48	?							SMW	Snout min width (mid snout)
OUM1300	pers. obs.	0	0	3.57192	541.2	166.6	26.8	393.2	31	52.6	22.6	19.9	?	?	132.8	58.2	?							SL_RTO	Snout length rostral to orbits
Alberta__145413	photo	0	1	3.60558	546.3	182.7	31.3	411.9	37.2	61.2	21.1	25.2	?	?	137.8	54.9	?							PEMW	Premaxillary expansion max width
UMMZ155302	photo	0	0	3.71382	562.7	202.6	35.5	402.2	37.1	51.6	18.5	22.4	?	?	154.7	60.8	?							NMW	Naris max width
LDUCZ-X1206	pers. obs.	0	0	3.73098	565.3	243.5	33.9	391.6	38.7	58.6	22.8	24.7	?	?	155.1	58.6	?							NML	Naris max length
SM_28133	photo	0	0	3.73428	565.8	213.7	31.8	412	37.4	59.3	21.4	26.7	?	?	158.1	66.4	?							NFMW	Narial fossa max width
UF_118998	photo	0	1	3.74022	566.7	197.7	31.7	393.1	37.4	54.5	22.6	25.7	?	?	152.3	58	45.3							NFML	Narial fossa max length (rostr to naris)
CMNH_75-16	photo	0	0	3.74484	567.4	195.5	35.7	405.2	36.8	51.9	19.4	25.3	?	?	163.7	72.3	?							MWAO	Max width across orbits
Madras Crocodile Bank Trust male	pers. obs.	1	1	3.8346	581	217	30	396	55	85	31	31	70	20	172	55	58.5							IW	Interorbital width
ZSM29_1912_DS	photo	0	?	3.87222	586.7	205.4	33.4	422.7	36.6	48.5	18.8	26.6	?	?	150.1	55.2	?							PBL_R	Pterygoid bulla length (right)
Alberta_145513	photo	0	1	3.87288	586.8	192.6	27.5	433.4	36.1	61	20.4	27.3	?	?	148.7	63.6	?							PBL_L	Pterygoid bulla length (left)
RSM_1945_44	photo	0	0	3.98574	603.9	225.2	37.8	431.7	38.3	57.5	26.8	25.1	?	?	174.8	69.2	?
FMNH_22025	photo	0	1	4.02996	610.6	217.5	34.1	452	42.2	66.7	24.4	33.8	?	?	166.1	66.7	36.9
NH.Z.1424	pers. obs.	0	1	4.0755	617.5	244.6	?	420.4	45.8	73.6	31.2	29.7	?	?	158.6	63.8	39.2
NEWHM_S1439	photo	0	?	4.09134	619.9	239.1	39.1	436.2	44.7	67.7	26.5	27.4	?	?	171.3	72.9	?
LDUCZ-X444	pers. obs.	0	1	4.18374	633.9	243.1	?	506.4	46.3	64.8	25.1	30.5	?	?	169.7	70.3	46.2
BMNH 1935-6-4-1	pers. obs.	0	0	4.24182	642.7	228.3	35.5	453.5	40.3	65.5	23.4	28.7	?	?	164.5	69.5	?
VIS05R	photo	0	?	4.2603	645.5	240.4	43.3	472.4	42.4	67	?	?	?	?	186.3	84.6	?
LDUCZ-X1207	pers. obs.	0	1	4.2669	646.5	239.4	39.2	457.5	45.4	66.7	24.1	30.4	?	?	162	61.3	?
NH.Z.1123	pers. obs.	0	?	4.32036	654.6	235.1	?	485.4	51.8	75.5	?	?	?	?	169.5	78.1	?
MNHN_A5312	photo	0	1	4.3296	656	213.9	41	463.4	41.2	62.2	23.4	24.7	?	?	182.7	71.2	43.9
QMBC 0006	pers. obs.	1	1	4.44774	673.9	228.7	33.2	494.8	47.5	68.8	23.7	32.9	31.8	?	168.6	68.1	42.95
R.5785	pers. obs.	0	1	4.47612	678.2	239.5	38.4	500.5	47.2	71.7	?	?	?	?	186.6	81.1	70.2
NH.Z.876	pers. obs.	0	0	4.59558	696.3	268.3	?	481.8	50.2	74.8	25	30.6	?	?	190.8	83.1	?
UCRCRV291	photo	1	1	4.59954	696.9	252	40.1	494.4	46.1	72.4	25.4	36.5	28.1	35.9	190.6	80.8	48.05
BMNH 1869.8.28.159	pers. obs.	1	1	4.6497	704.5	273.07	41.4	502.3	62.3	92.3	37.9	35.2	53.4	39.2	193.7	82.3	?
NEWHM_S1153	photo	0	?	4.6629	706.5	278.9	45.3	504	51.1	80	30.9	40	?	?	201.3	86.3	?
ZSM62_1959_DS	photo	0	?	4.6794	709	275	43.5	512	58.8	88.6	31.6	32	?	?	189.7	80.3	?
BMNH 275	pers. obs.	1	1	4.75926	721.1	289.7	?	516.3	62.4	86.4	?	?	?	?	187.4	92.8	?
AMNH-15176	photo	1	1	4.83054	731.9	305.2	43.3	505.4	65.9	96.3	38.3	30.5	71.5	42.1	245.3	110.5	63.65
MB_Unnumbered_specimen	photo	0	0	4.90116	742.6	280.8	41	531.9	52.1	84.9	35.6	37.7	?	?	212.7	99.9	?
SM_37951	photo	1	?	4.9137	744.5	291.6	?	540.8	55.7	82	35	32.8	60.1	34.1	208.6	83.1	?
AMNH-7138	photo	1	1	4.94208	748.8	285.8	44.6	532.4	53.5	84.3	33.5	36.8	30.5	29.8	211.3	84.2	54.85
REDCZ_ 277	photo	0	0	4.96386	752.1	261.9	38.9	550	45.6	73.4	26.4	33.7	?	?	189.6	78.4	?
AD.5644	photo	1	1	4.99488	756.8	276.3	44.3	539.3	53.1	78.5	38.7	35.1	31.1	31.8	210	91.8	58.5
R.5792	pers. obs.	1	1	5.0259	761.5	323.02	53.7	506.3	82.6	114	45.7	43.4	75.9	42.4	239.8	95.2	69.8
BMNH 704	pers. obs.	1	1	5.07276	768.6	304.4	?	520.3	48.7	81.4	39.42	41.1	89.13	23.9	220.31	87	32.1
LDUCZ-X215	pers. obs.	1	1	5.09124	771.4	322.9	50.6	530.2	77.1	128.2	43	42.4	86	47.2	225.4	86.9	81.5
OUM13326	pers. obs.	1	?	5.11012	774.26	311.7	45.3	596.8	76	110.7	?	?	?	?	216.3	0?	?
RSM_1948.58.1	photo	0	1	5.13744	778.4	286.4	45.4	559.8	51.4	79.2	32.4	37.4	?	?	?	87	55.75
BMNH_Unnumbered_specimen (with skin from the tip of the snout to part way up the rostrum)	pers. obs.	1	1	5.18034	784.9	306.9	46.7	540	77.3	123.6	45.6	42.3	64.1	52.8	223.2	91.5	68.8
OUM5412	pers. obs.	1	1	5.19288	786.8	328.6	?	547.1	84.3	157.6	42.1	39.4	69.3	48.7	208.9	89	77.4
BMNH 2005.1601	pers. obs.	1	1	5.19354	786.9	287.9	?	549.2	57.9	97.6	38.2	43	66.2	45.4	207.6	89.4	62.25
R.5790	pers. obs.	1	1	5.20674	788.9	334.8	?	560.4	76.7	109.1	46.2	42.5	74.1	46.4	232.7	100.7	82.5
NH.3.108	pers. obs.	1	?	5.21796	790.6	304	46.5	557.8	65.7	97.2	?	?	?	?	208.3	93.2	?
MCZ R-46551	photo	1	1	5.24832	795.2	364.5	?	542.5	77.3	102.7	38.1	45	52.4	18.8	260.7	111.7	69.5
MNHN_1944_249	photo	1	1	5.25756	796.6	303.9	51.1	552.4	69.5	?	?	?	?	?	248.1	111.7	62.7
NMINH_2008.89.60	photo	1	?	5.26416	797.6	324.7	52.7	574.3	68.4	112.1	43.2	38.1	84.6	39.5	240.7	105.7	?
BMNH 1974-3009	pers. obs.	1	1	5.28739	801.12	316.2	45.5	545	75.4	107.8	41.8	40.6	66.5	46.3	216.4	95.4	61.7
Indian Statistical Institute male	pers. obs.	1	1	5.2932	802	299	47	568	80	118	46	44	81	30	228	95	58
NEWHM_S0541	photo	1	?	5.37834	814.9	335.6	52.5	551.2	65.7	107.6	41	36.5	36.5	26.5	249.1	103.6	?
Iordansky 1973_Unnumbered_specimen	Illustration	1	1	5.39352	817.2	303.7	60.8	572.5	84.6	130.9	47.9	40.5	95.7	53.4	241.1	92	71.2
ZSM28_1912_DS	photo	1	?	5.41728	820.8	330.6	51.1	578.8	81.6	123.5	45.8	39.7	94.8	46.4	228.8	81.7	?
ZSM2582-0_DSC	photo	1	?	5.4186	821	338.6	50.6	569.4	84	118.9	40	37.5	73.7	52.3	252.8	115.4	?
MNHN_1944_250	photo	1	1	5.4483	825.5	326.3	?	590.8	60.1	96.7	38.2	34.7	?	?	247.8	106.8	72.05
RSM_1948.58.2	photo	1	1	5.48658	831.3	332.5	50.6	577.2	77.5	106.5	38.8	39.2	?	?	231.7	100.5	70.55
NEWHM_H163	photo	1	?	5.62782	852.7	356.2	?	589.2	84.4	127.4	48.4	38.5	50.5	49.5	261.8	112.6	?
R.5783	photo	1	1	5.70504	864.4	342.5	46.4	616.2	95.3	153	?	?	?	?	254.6	110.1	?
BMNH 1975.1418	pers. obs.	0	?		?	?	?	293.01	21.03	32	11.9	15.7	?	?	?	?	?
BMNH 1983.1131	pers. obs.	?	1		?	206.9	31	?	46.7	?	?	?	?	?	145.9	53.3	46.8
R.5789	pers. obs.	0	?		?	?	?	326.2	28.3	46	16.1	19.7	?	?	?	?	?

## Sheet: Table S1
Table S1. Results of reduced major axis regressions. Significant results reported in bold. Abbreviations: CI, confidence interval; MW, maximum skull width; RMA, reduced major axis. Other abbreviations as in text.
Log variable (vs. log MW)	N	RMA intercept	RMA slope	CI lower limit (95%)	CI upper limit (95%)	R2	p	Allometry
BSL	103	0.87901	0.815	0.745	0.884	0.969	< 0.0001	negative
OCW	85	-0.44187	0.849	0.792	0.899	0.95	< 0.0001	negative
SL_RTO	103	0.59774	0.876	0.761	1.01	0.93	< 0.0001	isometric
SMW	104	-0.64486	0.98	0.928	1.02	0.966	< 0.0001	isometric
PEMW	102	-0.64901	1.06	1.01	1.1	0.964	< 0.0001	positive
NMW	90	-1.0047	1.03	0.963	1.07	0.958	< 0.0001	isometric
NML	90	-0.53263	0.846	0.806	0.883	0.971	< 0.0001	negative
MWAO	102	0.003814	0.945	0.906	0.984	0.99	< 0.0001	negative
IW	103	-1.1527	1.27	1.21	1.32	0.983	< 0.0001	positive

## Sheet: Table S2
Table S2. Results of follow-up reduced major axis regressions for the males.
Log variable (vs. log MW)	N	RMA intercept	RMA slope	CI lower limit (95%)	CI upper limit (95%)	R2	p	Allometry
NMW	36	-1.77	1.35	1.13	1.53	0.825	< 0.0001	positive
SMW	43	-1.75	1.44	1.24	1.59	0.813	< 0.0001	positive
PEMW	41	-1.68	1.49	1.21	1.7	0.777	< 0.0001	positive
NFMW	24	-5.64	2.99	1.42	8.36	0.15	0.0584	--
NFML	23	-5.07	2.67	1.47	9.27	0.108	0.121	--
PBL	28	-1.77	1.44	0.927	1.8	0.444	0.0002	isometry

## Sheet: Table S3
Table S3. Results for normality and dip tests of the RMA residuals. Significant results reported in bold.
Variable	N	Shapiro-Wilk W	Shapiro-Wilk p	Anderson-Darling A	Anderson-Darling p (Monte Carlo)	Hartigan’s D	Hartigan’s p	Mixture analysis: Best-fit # groups (AIC)	Mixture analysis: Equivalencies (ΔAIC < 2)
BSL	103	0.769	< 0.0001	3.97	< 0.0001	0.0276	0.876	2 (-577.7)	--
OCW	85	0.922	< 0.0001	2.66	< 0.0001	0.0195	1	6 (-433.2)	7
SL_RTO	103	0.751	< 0.0001	3.76	< 0.0001	0.0255	0.953	2 (-496.9)	3
SMW	104	0.958	0.00209	1.85	< 0.0001	0.0189	1	5 (-492.2)	7
PEMW	102	0.941	0.000187	1.29	0.002	0.0381	0.352	2 (-451.6)	--
NMW	90	0.947	0.00111	0.422	0.326	0.0291	0.87	5 (-393.9)	--
NML	90	0.981	0.198	0.312	0.567	0.0283	0.915	6 (-464.4)	--
MWAO	102	0.871	< 0.0001	2.29	< 0.0001	0.0315	0.701	5 (-630.2)	2
IW	103	0.903	< 0.0001	0.97	0.0143	0.0267	0.907	1 (-488.2)	--
Just adults (MW ≥ 179 mm)
Variable	N	Shapiro-Wilk W	Shapiro-Wilk p	Anderson-Darling A	Anderson-Darling p (Monte Carlo)	Hartigan’s D	Hartigan’s p	Mixture analysis: Best-fit # groups (AIC)	Mixture analysis: Equivalencies (ΔAIC < 2)
SMW	61	0.954	0.0223	1.22	0.0035	0.0307	0.971	5 (-291.5)	--
PEMW	59	0.948	0.0133	1.01	0.0114	0.0384	0.789	3 (-273.6)	4,5
NMW	52	0.97	0.203	0.415	0.33	0.048585	0.465	8 (-278.7)	--

## Sheet: Table S4
Table S4. F-test pairwise comparisons of residuals for adult gharials with Holm-Šidák adjustment. Upper right half of table reports F-values; lower left half reports p-values. Significant p-values reported in bold.
	BSL	OCW	SL_RTO	SMW	PEMW	NMW	NML	MWAO	IW
BSL	--	3.21	1.72	6.09	6.38	6.07	2.97	1.01	3.17
OCW	0.0098	--	1.87	1.9	1.99	1.89	1.08	3.17	1.01
SL_RTO	0.0716	0.0827	--	3.55	3.72	3.54	1.73	1.69	1.85
SMW	0.0001	0.0281	0.0001	--	1.05	1	2.05	6	1.92
PEMW	0.0001	0.0463	0.0005	0.852	--	1.05	2.15	6.29	2.01
NMW	0.0001	0.0291	0.0001	0.991	0.853	--	2.04	5.99	1.91
NML	0.0008	0.826	0.0323	0.0046	0.012	0.0025	--	2.93	1.07
MWAO	0.971	0.007	0.052	0.0001	0.0001	0.0001	0.0003	--	3.13
IW	0.0006	0.974	0.0369	0.0115	0.0293	0.0094	0.812	0.0004	--
